# Supplementary material for: The CIMMYT Australia ICARDA Germplasm Evaluation concept: a model for international cooperation and impact
Source: PubMed Central journal article supplement (PMC11319148; doi:10.3389/fpls.2024.1435837), 2024-07-30
Supplement: Table_1.pdf [file Table_1.pdf]

Appendix Table 1. Trial locations, years sown and associated statistics for the CAIGE bread wheat data set 2017 – 2020.

| State                  | Nearest town  | GPS location                |      |      |      |      | Number of Plot | Number of Genotypes | Partials replication (%) | Trial mean yield (t/ha) | Reliability | Genetic Variance | Additive Variance (%) |
|------------------------|---------------|-----------------------------|------|------|------|------|----------------|---------------------|--------------------------|-------------------------|-------------|------------------|-----------------------|
|                        |               |                             | 2017 | 2018 | 2019 | 2020 |                |                     |                          |                         |             |                  |                       |
| Queensland (QLD)       | CONDAMINE     | <a href="#">27°S 150°E</a>  |      |      |      | ✓    | 288            | 252                 | 14                       | 4.1                     | 0.61        | 0.11             | 30                    |
|                        | GATTON        | <a href="#">28°S 152°E</a>  |      |      |      | ✓    | 288            | 244                 | 18                       | 2.8                     | 0.63        | 0.24             | 0                     |
| New South Wales (NSW)  | JUNEE         | <a href="#">35°S 148°E</a>  | ✓    | ✓    |      | ✓    | 240-420        | 208-353             | 14-67                    | 1.6-4.3                 | 0.82-0.90   | 0.03-0.37        | 22-55                 |
|                        | NARRABRI      | <a href="#">30°S 150°E</a>  | ✓    | ✓    | ✓    | ✓    | 420-624        | 234-501             | 24-100                   | 3.8-5.7                 | 0.66-0.88   | 0.15-0.24        | 14-53                 |
|                        | NORTH STAR    | <a href="#">29°S 150°E</a>  | ✓    |      | ✓    | ✓    | 288-360        | 180-317             | 5-61                     | 0.8-4.2                 | 0.48-0.77   | 0.02-0.16        | 39-55                 |
|                        | EDGEROI       | <a href="#">30°S 150°E</a>  |      | ✓    |      |      | 240            | 197                 | 19                       | 3.3                     | 0.67        | 0.07             | 61                    |
|                        | SPRING RIDGE* | <a href="#">31°S 150°E</a>  |      |      |      | ✓    | 288            | 264                 | 7                        | 4.9                     | 0.79        | 0.97             | 23                    |
|                        | SPRING RIDGE* | <a href="#">31°S 150°E</a>  |      |      |      | ✓    | 288            | 232                 | 19                       | 4.6                     | 0.79        | 0.97             | 23                    |
| Victoria (VIC)         | HORSHAM       | <a href="#">37°S 142°E</a>  | ✓    |      |      |      | 288            | 190                 | 52                       | 6.6                     | 0.78        | 0.34             | 53                    |
|                        | SWAN HILL     | <a href="#">35°S 143°E</a>  |      |      | ✓    |      | 288            | 233                 | 19                       | 0.6                     | 0.79        | 0.06             | 49                    |
|                        | LALBERT       | <a href="#">36°S 143°E</a>  |      |      |      | ✓    | 288            | 264                 | 9                        | 2.9                     | 0.85        | 0.16             | 30                    |
|                        | LONGERENONG   | <a href="#">37°S, 142°E</a> |      |      |      | ✓    | 288            | 257                 | 12                       | 3.2                     | 0.35        | 0.12             | 56                    |
| South Australia (SA)   | BALAKLAVA     | <a href="#">34°S 138E</a>   | ✓    |      |      | ✓    | 336-420        | 213-400             | 5-56                     | 2.3-2.5                 | 0.56-0.81   | 0.03-0.10        | 29-39                 |
|                        | ROSEWORTHY    | <a href="#">35°S 139°E</a>  | ✓    | ✓    |      | ✓    | 240-576        | 206-501             | 14-64                    | 2.7-5.1                 | 0.71-0.89   | 0.12-0.46        | 22-49                 |
| Western Australia (WA) | TOODYAY       | <a href="#">32°S 116°E</a>  | ✓    | ✓    | ✓    |      | 240-312        | 201-221             | 17-55                    | 2.5-4.5                 | 0.47-0.65   | 0.06-0.19        | 31-54                 |
|                        | DANDARAGAN    | <a href="#">31°S 116°E</a>  |      | ✓    | ✓    |      | 240-288        | 194-221             | 20-21                    | 2.3-3.7                 | 0.53-0.81   | 0.04-0.27        | 8-49                  |
|                        | CORRIGIN      | <a href="#">32°S 118°E</a>  |      |      | ✓    | ✓    | 288            | 232-245             | 18-24                    | 0.9-1.2                 | 0.65-0.71   | 0.01-0.07        | 33-57                 |
|                        | GOOMALLING    | <a href="#">31°S 117°E</a>  |      |      | ✓    | ✓    | 288-420        | 245-319             | 18-32                    | 2.0-2.3                 | 0.52-0.56   | 0.02-0.04        | 33-42                 |
|                        | MINGENEW      | <a href="#">29S 115°E</a>   |      |      |      | ✓    | 288            | 271                 | 6                        | 4.0                     | 0.67        | 0.23             | 34                    |
|                        | YORK          | <a href="#">32°S 117°E</a>  |      |      |      | ✓    | 288            | 269                 | 7                        | 2.3                     | 0.63        | 0.05             | 45                    |

\*Two trials grown at Spring Ridge in 2020.
